# Supplementary figures and images for: Expression of ZIC family genes in meningiomas and other brain tumors
Source: Springer Nature journal article supplement (doi:10.1186/1471-2407-10-79), 2010-03-03

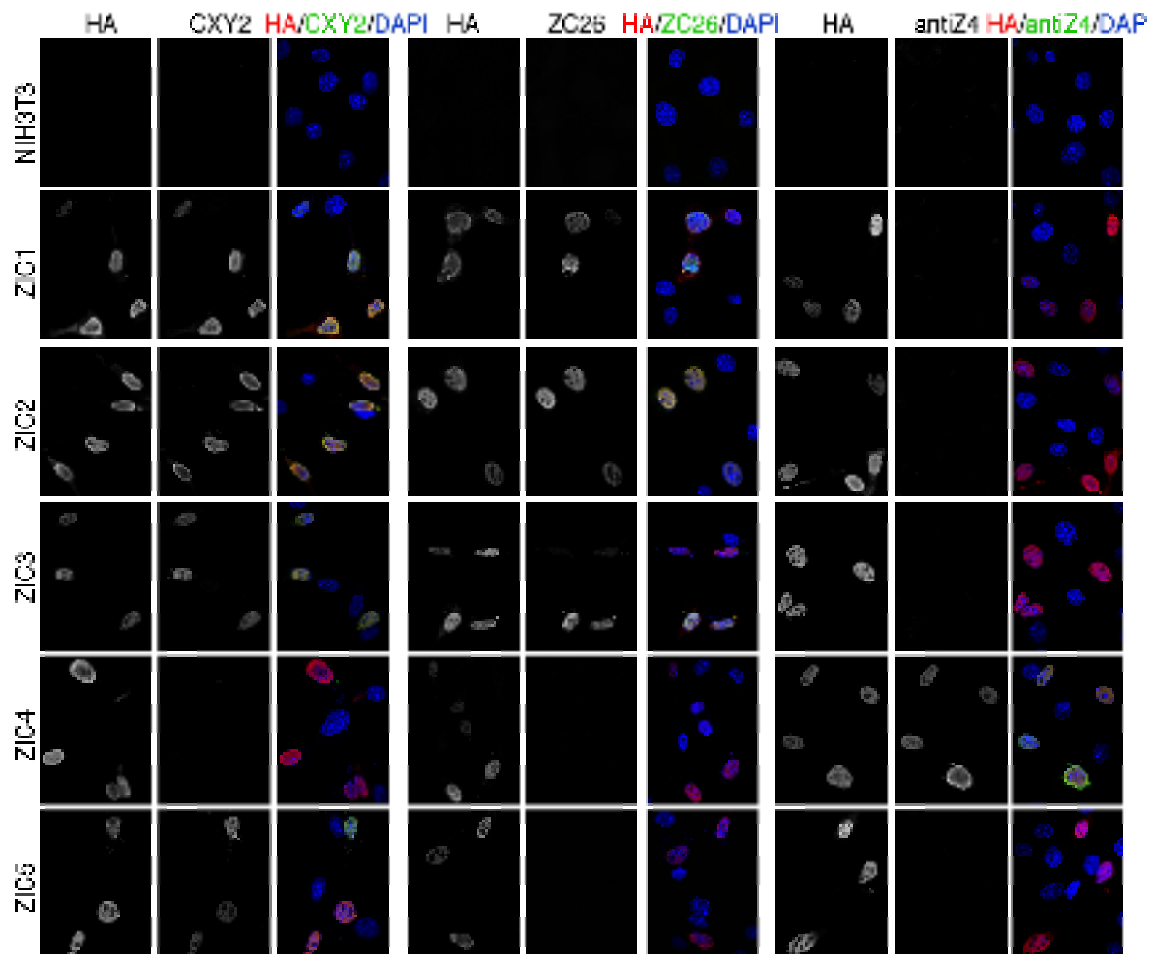

Supplemental Figure 1

Supplement: Additional file 1 [file 1471-2407-10-79-s1.pdf]
